# Supplementary material
Source: publisher figshare collection journal article supplement (https://future-science-group.figshare.com/ndownloader/files/31096540)
Supplement: Supplementary file 1 [file 31096540]

**Supporting Information**

**Norepinephrine Transporter Analogue Benzylguanidine Conjugated Nanoparticles in the Treatment of Neuroblastoma**

Ozlem Ozen Karakus, Kavitha Godugu, Taher Salaheldin, Kazutoshi Fujioka, Shaker A. Mousa*

Pharmaceutical Research Institute, Albany College of Pharmacy and Health Sciences, Rensselaer, New York 12144, United States

Running Title:Nano-targeting of Neuroblastoma

*Corresponding Author

Shaker A. Mousa

The Pharmaceutical Research Institute

Albany College of Pharmacy and Health Sciences

1 Discovery Drive (Room 238)

Rensselaer, New York 12144 USA

Phone: +01 518 694 7397 FAX +01 518 694 7397

Email: [shaker.mousa@acphs.edu](mailto:shaker.mousa@acphs.edu)

**Figure S1.** 1H-NMR of compound 1

**Figure S2.** 13C-NMR of compound 1

**Figure S3:** 1H-NMR of compound 2

**Figure S4:** 13C-NMR of compound 2

**Figure S5:** 1H-NMR of compound 3

**Figure S6:** 1H-NMR of compound 4

**Figure S7:** 13C-NMR of compound 4
